## Mesoscale Analyses of Fungal Networks

Sang Hoon Lee,<sup>1,\*</sup> Mark D. Fricker,<sup>2,3</sup> and Mason A. Porter<sup>4,3</sup>

<sup>1</sup>*Oxford Centre for Industrial and Applied Mathematics, Mathematical Institute, University of Oxford, Oxford OX2 6GG, United Kingdom*

<sup>2</sup>*Department of Plant Sciences, University of Oxford, South Parks Road, Oxford OX1 3RB, United Kingdom*

<sup>3</sup>*CABDyN Complexity Centre, University of Oxford, Oxford OX1 1HP, United Kingdom*

<sup>4</sup>*Oxford Centre for Industrial and Applied Mathematics, Mathematical Institute, University of Oxford, OX2 6GG, United Kingdom*

We give a brief application of mesoscopic response functions (MRFs) to a large set of networks of fungi and slime moulds. We construct “structural networks” by estimating cord conductances (which yield edge weights) from experimental data and “functional networks” by calculating edge weights based on how much nutrient traffic is predicted to occur on each edge. Both types of networks have the same topology, and we compute MRFs for both families of networks to illustrate two different ways of constructing taxonomies to compare large sets of fungal and slime-mould networks to each other. We demonstrate that network taxonomies allow objective groupings of networks across species, treatments, and laboratories. We believe that the groupings that we have derived through our structural and functional taxonomic analyses of fungal networks could be of considerable assistance to biologists in their attempts to capture the impact of treatment combinations on network behaviour.

PACS numbers: 47.63.Jd, 87.19.rh, 89.40.-a, 89.75.Fb

### I. INTRODUCTION

Fungi are unusual multi-cellular macroscopic organisms: their entire growth form is a living network of interconnected microscopic tubular cells (termed “hyphae”) that can branch, fuse, or aggregate to form larger, visible structures (termed “cords”) [8]. The resulting mycelial network has to transport nutrients from acquisition sites to the growing tips to fuel further exploration for new resources that exist with an unknown distribution in a fluctuating, patchy, and competitive environment [8]. Additionally, mycelial networks provide food for small grazing invertebrates, and they thus suffer continuous attack and damage [3].

Because fungi do not have a centralised system to coordinate development, one can posit from the diversity of recognisable network patterns that each fungal species uses a (slightly) different set of local rules to continuously balance investment in growth, transport efficiency, and resilience that collectively maximise the long-term global success of the organism. Constructing taxonomies of fungal networks thus have the potential to provide insights into adaptive fungal behaviour and to help elucidate the similarities and differences among the underlying behavioural rules. A fungus is essentially a living network; we describe the change in fungal network architecture as *network behaviour*.

It is also relevant to compare fungal networks to the acellular slime mould, *Physarum polycephalum*, which is a second type of network-forming organism that is taxonomically very distinct from fungi. (The acellular slime mould is essentially a single giant animal cell.) One can grow fungi and slime moulds in laboratories, and it is consequently possible to expose them to a wide variety of experimental conditions, in multiple replicates, to generate a rich collection of

networks for analysis. Therefore, investigating such adaptive, self-organised networks — which are honed by evolution — provides a fascinating opportunity to (1) uncover underlying principles of network organisation in a biological context and (2) explore how much utility biologically-inspired algorithms have in other domains [6, 11, 18].

### II. DATA AND METHODS

To make progress in the study of fungal networks, it is important to develop tools to characterise their structure, their function, and how they develop over time and using different treatments. Initial network characterisations were based on translating a mycelial image to a planar, weighted, undirected graph. In these characterisations, the nodes are located at hyphal tips, branches, and anastomoses (i.e., hyphal fusions). The edges represent cords, and their weights are determined from the Euclidean length ( $L$ ) and radius ( $r$ ) of each cord combined either as (1) the cylindrical volume  $V = \pi r^2 L$  to represent the biological “cost” of the cord or (2) the predicted conductance  $G = r^2/L$ . The conductance assumes that the cords are bundles of equally-sized vessels, so that the aggregate conductance scales with the cross-sectional area of the whole cord (rather than a single vessel, in which case the conductance would scale with  $r^4$  for Poiseuille flow).<sup>1</sup> In the present paper, we refer to these network representations as *structural networks*. Simple network measures — such as notions of meshedness (for planar networks), clustering coefficients, and betweenness centrality — have been measured from graph representations of fungal networks [1]. However, the computation of simple diagnostics has not been able to capture

\*Corresponding author: lee@maths.ox.ac.uk

<sup>1</sup> Note that [15] used the cylindrical volume  $V = \pi r^2 L$ , although the authors of that paper mistakenly wrote that they used conductance.

the subtle differences in spatial structure between species or in the same species when they are responding to different experimental conditions (which a human observer can describe qualitatively but not quantitatively) [8]. More detailed measurements and modelling have been used to (1) experimentally define development of network architecture over time; (2) predict the flow of water and nutrients through the resulting empirical network using an advection and diffusion model; and (3) compare model output with experimentally measured radiolabel distributions used to track the actual nutrient movement [7, 8]. Although such an approach has revealed good correlations between growth-induced fluid flows and nutrient transport — and one can even see hints of the local rules that optimise behaviour — it is too technically demanding and costly to be used as a routine analysis across multiple data sets. Other approaches are thus necessary to compare the structures and function of a large set of fungal species (and of the same species over time and in different experimental conditions).

In a recent paper [15], two of us (and our coauthors) illustrated that examining community structure of fungal networks using a mesoscopic response function (MRF) provides biologically-sensible clusterings of (1) different species and (2) developmental stages for a particular species. In the present paper, we explore the utility of such community-based classification using a large set of fungal networks that includes a wide variety of different developmental stages and treatments. We also examine the difference in classification based on a structural view of such networks that uses only the predicted conductance  $G$  of each cord to one that is based on a predicted functional view of the importance of each cord for transport. For the latter, we calculate the weight of each cord using a “path score”, which is a diagnostic (see the definition below) that measures its importance for transport of nutrients in a network in a way that is more nuanced than the standard betweenness measures [13]. The computation of path scores highlights “core-periphery structure” in fungal networks that are based on transport properties rather than on the usual density-based notions of core-periphery structure [4]. In a fungal (or slime-mould) network, we expect core cords to highlight the dense parts of the network near the inoculum (i.e., source material for a new culture) or in parts that connect to additional resources, whereas the periphery could correspond to the foraging margin. Transport-based measures of core-periphery structure for both nodes and edges in networks were recently investigated in a wide variety of networks and using different transportation strategies (e.g., both geodesics and random walks) [13]. Because one of the primary predicted functions of fungal networks is nutrient transport, it is more appropriate to examine core versus peripheral edges (i.e., cords) rather than nodes.

As discussed in [13], we quantify a transport-based measure of “coreness” called the *path score* (PS) for each edge by examining which cords appear the most often on “backup paths” if any particular cord is broken. This measure thereby incorporates elements of both betweenness centrality and network resilience. We expect that core edges in a network should occur more frequently than peripheral edges in short

backup paths. One can define path scores for both directed and undirected networks and for both weighted and unweighted networks. We treat the networks that we construct from our fungal systems as weighted and undirected.

Let the set of edges be denoted by  $\mathbb{E} = \{(j, k) \mid \text{node } j \text{ is adjacent to node } k\}$ . The PS for edge  $e$  is defined by

$$\text{PS}(e) = \frac{1}{|\mathbb{E}|} \sum_{(j,k) \in \mathbb{E}} \sum_{\{p_{jk}\}} \sigma_{jek}[\mathbb{E} \setminus (j, k)], \quad (1)$$

where  $\sigma_{jek}[\mathbb{E} \setminus (j, k)] = 1/|\{p_{jk}\}|$  if edge  $e$  is in the set  $\{p_{jk}\}$  that consists of “optimal backup paths” from node  $j$  to node  $k$  (where we stress that *the edge*  $(j, k)$  *is removed from*  $\mathbb{E}$ ) and  $\sigma_{jek}[\mathbb{E} \setminus (j, k)] = 0$  otherwise.

To determine an optimal path between nodes  $i$  and  $j$ , we find the backup path  $p_b(i, j)$  that consists of the set of connected edges between  $i$  and  $j$  that minimises the sum of the resistances,  $\sum_{(k,l) \in p_b(i,j)} R_{kl}$ , for all edges  $(k, l)$  of the network in which the edge  $e_{ij} := (i, j)$  has been removed. The resistance of edge  $(k, l)$  is  $R_{kl} = 1/G_{kl}$ , where the conductance is  $G_{kl} = r^2/L$ , the quantity  $r$  is the radius of a cord, and  $L$  is the length of edge  $(k, l)$ . We set  $R_{kl} = 0$  (instead of  $R_{kl} = \infty$ ) when an edge is removed because the edge simply does not exist. To capture a functional view of the fungal networks (i.e., to obtain so-called *functional networks*), we also construct weighted networks in which we preserve topology but use PS values instead of conductance values as the edge weights.

In Fig. 1, we show a network formed by *Phanerochaete velutina* growing from five wood-block inocula that are placed in a pentagonal arrangement on a compressed black-sand substrate. The fungal network that forms has a relatively densely interconnected core and relatively tree-like foraging branches on the periphery. Adding a radiolabel to one of the wood blocks and subsequently doing photon-counting scintillation imaging (PCSI) provides a snapshot of how nutrients are transported at that particular instant through some of the core cords to a second wood block and then outwards to part of the network periphery. The PS values on the edges of a fungal network reflect the actual movement path in the region of the colony in which label was translocated, suggesting that the PS values capture some aspects of real nutrient movement in fungal networks. However, there is not a simple correspondence between PS values and observed nutrient transport, as there are cords with high PS values that could have been utilised to reach the neighbouring wood block on the left even though there is no detectable radiolabel translocation over the 12 hour time period of the measurement.

### III. RESULTS AND DISCUSSION

To compare the properties of the various structural and functional networks, we produce a taxonomy of the fungal networks from MRFs of each network [15] that highlight the mesoscale “community structure” [5, 16]. In network terms, communities are densely connected internally, and there are sparse connections between communities relative to a null model. To identify community structure, we optimise a multi-resolution version of the modularity quality function. We use

TABLE I: Species and experimental conditions used in Fig. 2.

| Attribute | Code/Level (Colour)               | Descriptions                                                                                                                         |
|-----------|-----------------------------------|--------------------------------------------------------------------------------------------------------------------------------------|
| Species   | <i>Pp</i>                         | <i>Physarum polycephalum</i> : an acellular slime mould that forms networks but is taxonomically distinct from fungi                 |
|           | <i>Pv</i>                         | <i>Phanerochaete velutina</i> : a foraging saprotrophic woodland fungus that forms reasonably dense networks                         |
|           | <i>Ag</i>                         | <i>Agrocybe gibberosa</i> : a foraging saprotrophic fungus that is isolated from garden compost and forms dense networks             |
|           | <i>Pi</i>                         | <i>Phallus impudicus</i> : forms regular, highly cross-linked networks but grows relatively slowly                                   |
|           | <i>Rb</i>                         | <i>Resenicium bicolor</i> : forages rapidly with a sparse network that is not very cross-linked                                      |
|           | <i>Sc</i>                         | <i>Strophularia caerulea</i> : a foraging saprotrophic woodland fungus that is isolated from birch woodland and forms dense networks |
| resources | I/min (blue)                      | Inoculum only                                                                                                                        |
|           | I+R/level 1                       | Initial colonised wood block (inoculum, I) plus a single additional wood-block resource (R)                                          |
|           | I+4 × R/level 2                   | Inoculum plus four additional wood-block resources (positioned as a cross)                                                           |
|           | I+4 × R/level 2                   | Inoculum plus four wood-block resources placed together                                                                              |
|           | 5 × I/level 3                     | Five inocula placed in a pentagonal arrangement                                                                                      |
|           | Tokyo/level 4                     | Pattern of oat flakes placed to match the major cities around Tokyo                                                                  |
|           | UK/max (red)                      | Pattern of oat flakes placed to match the major cities in the UK                                                                     |
| grazing   | U/min (blue)                      | Ungrazed                                                                                                                             |
|           | <i>Fc</i> /level 1                | <i>Folsomia candida</i> : a small soil arthropod that grazes on fungal networks with low density (10 per microcosm) [19]             |
|           | <i>Fc</i> or <i>Fc-M</i> /level 2 | <i>Fc</i> with medium density (20 per microcosm)                                                                                     |
|           | <i>Fc-H</i> /max (red)            | <i>Fc</i> with high density (40 per microcosm)                                                                                       |
| substrate | A/blue                            | Agar: used as a growth medium (substrate) for <i>Physarum polycephalum</i>                                                           |
|           | B/white                           | Black sand: a nutrient-free substrate used for radiolabel imaging experiments                                                        |
|           | S/red                             | Compressed, non-sterile soil that closely represents the natural growth environment for the fungi                                    |

the Newman-Girvan null model augmented by a resolution parameter and examine communities of different size scales by tuning a resolution parameter [14, 17]. For each network, we obtain curves for several scaled and renormalised quantities (number of communities, modularity, and entropy) as a function of the resolution parameter. These diagnostics yield a mesoscale fingerprint for each network. Two networks are close to each other in the taxonomy if their MRF curves have similar shapes to each other. (See [15] for details.) We thereby construct two taxonomies — one for the structural networks and another for the functional networks — that give a pair of “family trees” that describe how closely the various networks are related in the form of a dendrogram.

In Fig. 2, we show the resulting dendrograms for 270 fungal networks based on structure and function. (We include the data for all networks as Supplementary Material.) Recall that the structural and functional networks have the same topologies, but their edge weights are different: the weights are given by estimated conductance values for the structural networks and by PS values for the functional networks. For both the structural and functional fungal networks, the simplest network measures for each leaf (number of nodes, edges and node density) only reveal a limited correlation with the major branches in the dendrogram. This suggests that the clas-

sification is not trivially dominated by the size of each network and also that it is necessary to go beyond the computation of only such simple measures to produce a reasonable taxonomy. When we code leaves according to the values of the major attributes in each experiment (species, substrate, time point, resource level, and grazing intensity), we observe that groups with similar attributes begin to emerge and are visible as substantial contiguous blocks in the dendrograms. Nevertheless, we also observe that each attribute is not uniquely associated with one group, which suggests that the classifications are again not a trivial separation by any one of these attributes (e.g., species) alone. This suggests, in particular, that they also reflect similarity in the topologies and weights (i.e., geometries) of the networks.

The Pearson correlation coefficient between the MRF distance values (see Appendix B 2 of [15]) for the structural and functional network sets is 0.418. (The p-value is less than  $10^{-308}$ , which is the minimum value of floating-point variables in PYTHON.) In contrast, the mean correlation coefficient from 100 uniform-at-random permutations of the MRF distance values is  $2.12 \times 10^{-5}$ , with a standard deviation  $3.67 \times 10^{-3}$ . We infer that there is some degree of correlation between the weights in the structural and functional networks, although they clearly capture different properties of the fungi.

A key challenge is to try to interpret the taxonomic groupings from a biological perspective to yield additional insight that cannot be captured from qualitative descriptions of each network, particularly when making comparisons between different experiments from different laboratories over an extended time period. To do this, we follow the major branch points of the dendrograms in a top-down analysis of each taxonomy. We label branches in the dendrograms in the order in which they occur in the taxonomic hierarchies. In the conductance-based classification [see Fig. 2(A)], a small group splits off at a high level (1). This group then separates into two parts: one contains *Resinicium bicolor* (*Rb*) with some grazing (4), and the other has *Phanerochaete velutina* (*Pv*) grown on black sand (5). The other main branch splits to give two clusters (3), but the underlying rationale is not immediately obvious, as both parts include a mixture of different conditions of the attributes (see Table I). The clearest subsequent groupings emerge as clusters of *Pv* on black sand (6) and *Rb* with grazing at earlier time points (10).

Following the same top-down approach on the PS-based taxonomy [see Fig. 2(B)] provides groupings that are easier to interpret than the ones from the conductance-based taxonomy. The first set of high-level branch points (1, 2, 3, 5, and 6) all separate clades of *Pv* on black sand, and the sub-parts are grouped roughly according to the amount of resource. Branch point (4) separates a group of *Rb* with varying levels of grazing. Branch point (7) yields a single *Pi* network that separates from a large grouping with a fine-grained structure. Lying under junction point (10) are two primary clusters of networks. In the first, there appears to be a trade-off between large amount of resource, longer time points, and grazing (and *Pv*, *Rb*, and *Pp* are all represented). We infer that different treatments can yield networks that nevertheless exhibit similar functional behaviour for several species. The second cluster is more homogeneous; it consists predominantly of *Pv* on black sand with high levels of resource. Finally, the groups under junction point (11) consist of *Pv*, *Rb*, and *Pp* with a mix of attributes.

It is not surprising that the structural and functional taxonomies both contain fine-grained complexity in their terminal groups, as several of the attributes have opposing effects that depend on the developmental age of each species and the combination of treatments. For example, as a fungal network grows, it tends to change from a branching tree to a more highly cross-linked network through hyphal and cord fusions, whose core subsequently starts to thin out as it explores further until resources run out and the network progressively recycles more cords and again becomes a very sparse network [1, 2]. (“Cross-links” arise when one cord connects to another.) Additionally, some of the clearest clusters in the PS-based taxonomy correlate with substrate, as there are distinct branches in the taxonomy that consist predominantly of *Pv* grown on black sand. Thus, even though *Pv* is well-represented in the dendrogram, there is a distinguishable effect of substrate on network architecture that is not readily apparent to a human observer. Such observations underscore the fact that taxonomical groupings of fungal networks that are derived through network analysis can be of considerable

assistance to biologists in their attempts capture the impact of treatment combinations on network behaviour. The construction and analysis of network taxonomies also allow objective groupings of networks across species, treatments, and laboratory settings.

Constructing structural and functional taxonomies has the potential to be crucial for the development of increased understanding of subtle behavioural traits in biological networks. This type of approach should become more important as more networks are included in the classification — particularly if at least some have associated experimentally validated functional attributes [7–9]. Recently developed sophisticated network extraction algorithms [12] can dramatically improve the speed, accuracy, and level of detail of fungal networks. They also facilitate automated, high-throughput analysis of fungal network images, which can in turn be used to construct a richly detailed set of networks that are ripe for study via structural and functional network taxonomies.

#### IV. CONCLUSIONS

We calculated mesoscopic response functions (MRFs) for a large set of networks of fungi and slime moulds. We considered two types of networks: (1) “structural” networks in which we calculate edge weights based on conductance values; and (2) “functional” networks in which we calculate edge weights based on an estimate of how important edges are for the transport of nutrients. Calculating MRFs for the fungal and slime-mould networks in each of these two situations makes it possible to construct taxonomies and thereby compare large sets of fungal networks to each other. We illustrated that network taxonomies allow objective groupings of networks across species, treatments, and laboratories. We thus believe that the groupings that we have derived through our structural and functional taxonomic analyses of fungal networks could be of considerable assistance to biologists in their attempts capture the impact of treatment combinations on network behaviour.

#### Supplementary Material

We include the entire set of 270 networks as Supplementary Material online at [https://sites.google.com/site/lshlj82/fungal\\_networks\\_MATLAB.zip](https://sites.google.com/site/lshlj82/fungal_networks_MATLAB.zip), which includes the sparse adjacency matrices **A** and the coordinate matrices (the first and second columns represent horizontal and vertical coordinates, respectively) of the node coordinates in MATLAB format. We use the codes in Table I to name the files, and the folders *Conductance* and *PathScore* contain the conductance-based and PS-based edge weights, respectively. The complete list of fungal networks is also provided as a spreadsheet file *list\_of\_fungal\_networks.xlsx* in Microsoft Excel format.

## Acknowledgements

SHL and MAP acknowledge a grant from the EPSRC (EP/J001759/1). MDF acknowledges grant RGP0053/2012 from Human Frontiers of Science Program. We thank D.

Leach, S. Kala, G. Tordoff, and M. Anantharaman for collecting images and networks that have not yet been published. The MRF source code is available at [http://www.jponnela.com/web\\_documents/mrf\\_code.zip](http://www.jponnela.com/web_documents/mrf_code.zip).

- 
- [1] Bebber, D., Hynes, J., Darrah, P. R., Boddy, L., & Fricker, M. D. (2007). Biological solutions to transport network design. *Proc. Roy. Soc. B*, **274**, 2307–2315.
- [2] Boddy, L., Wood, J., Redman, E., Hynes, J., & Fricker, M. D. (2010). Fungal network responses to grazing. *Fung. Genet. Biol.*, **47**, 522–530.
- [3] Crowther, T. W., Boddy, L., & Jones, T. H. (2012). Functional and ecological consequences of saprotrophic fungusgrazer interactions. *The ISME Journal*, **6**(11), 1992–2001.
- [4] Csermely, P., London, A., Wu, L.-L., & Uzzi, B. (2013). Structure and dynamics of core/periphery networks. *Journal of Complex Networks*, **1**(2), 93–123.
- [5] Fortunato, S. (2010). Community detection in graphs. *Physics Reports*, **486**, 75–174.
- [6] Fricker, M. D., Boddy, L., Nakagaki, T., & Bebber, D. P. (2009). Adaptive biological networks. In Gross T. & Sayama H. (Eds.), *Adaptive Networks: Theory, Models and Applications* (pp. 51–70). Springer, New York, United States.
- [7] Heaton, L. L. M., López, E., Maini, P. K., Fricker, M. D., & Jones, N. S. (2010). Growth-induced mass flows in fungal networks. *Proceedings of the Royal Society B: Biological Sciences*, **277**, 3265–3270.
- [8] Heaton, L. L. M., Obara, B., Grau, V., Jones, N. S., Nakagaki, T., Boddy, L., & Fricker, M. D. (2012). Analysis of fungal networks. *Fungal Biology Reviews*, **26**, 12–29.
- [9] Heaton, L. L. M., López, E., Maini, P. K., Fricker, M. D., & Jones, N. S. (2012). Advection, diffusion, and delivery over a network. *Physical Review E*, **86**, 021905.
- [10] Katifori, E., Szöllősi, G. J., & Magnasco, M. O. (2010). Damage and Fluctuations Induce Loops in Optimal Transport Networks. *Physical Review Letters*, **104**, 048704.
- [11] Kunita, I., Yoshihara, K., Tero, A., Ito, K., Lee, C.-F., Fricker, M. D., & Nakagaki, T. (2013). Adaptive path-finding and transport network formation by the amoeba-like organism *Physarum*. In *Proceedings in Information and Communications Technology*, **6**, 14–29. Springer, New York, United States.
- [12] Obara, B., Garu, V., & Fricker, M. D. (2012). A bioimage informatics approach for extraction and analysis of fungal networks. *Bioinformatics*, **28**, 2374–2381.
- [13] Lee, S. H., Cucuringu, M., & Porter, M. A. (2014). Density-based and transport-based core-periphery structures in networks. *Physical Review E*, **89**, 032810.
- [14] Newman, M. E. J. (2010). *Networks: An Introduction* (Oxford University Press, UK).
- [15] Onnela, J.-P., Fenn, D. J., Reid, S., Porter, M. A., Mucha, P. J., Ficker, M. D., & Jones, N. S. (2012). Taxonomies of networks from community structure. *Physical Review E*, **86**, 036104.
- [16] Porter, M. A., Onnela, J.-P., & Mucha, P. J. (2009). Communities in Networks. *Notices of the American Mathematical Society*, **56**, 1082–1097, 1164–1166.
- [17] Reichardt, J., & Bornholdt, S. (2006). Statistical mechanics of community detection. *Physical Review E*, **74**, 016110.
- [18] Tero, A., Takagi, S., Saigusa, T., Ito, K., Bebber, D. P., Fricker, M. D., Yumiki, K., Kobayashi, R., & Nakagaki, T. (2010). Rules for Biologically Inspired Adaptive Network Design. *Science*, **327**, 439–442.
- [19] Tordoff, G. M., Boddy, L., & Jones, T. H. (2006). Grazing by *Folsomia candida* (Collembola) differentially affects mycelial morphology of the cord-forming basidiomycetes *Hypholoma fasciculare*, *Phanerochaete velutina* and *Resinicium bicolor*. *Mycological Research*, **110**, 335–345.

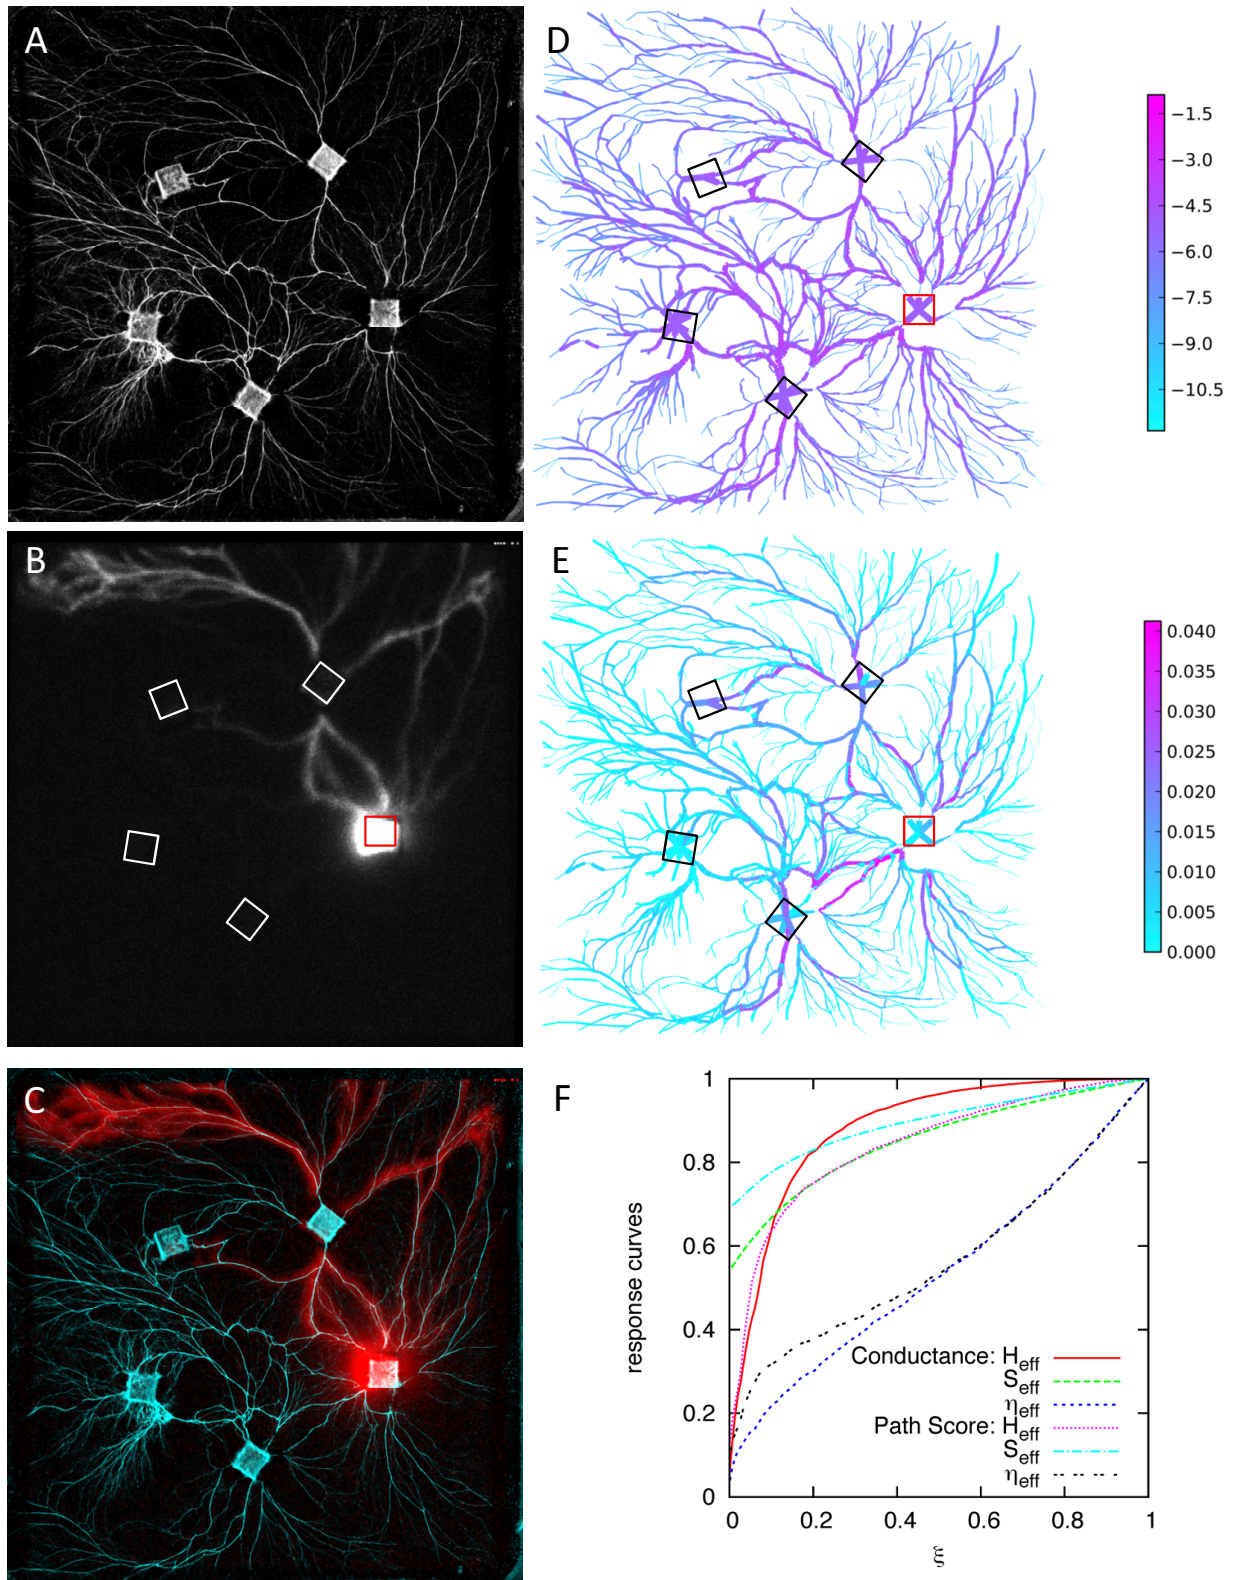

FIG. 1: (A) One of the fungal networks formed by *Phanerochaete velutina* after 30 days of growth across a compressed black-sand substrate from a pentagonal arrangement of wood-block inocula. (B) Path of radiolabeled nutrient ( $^{14}\text{C}$ -amino-isobutyrate) added at 30 days and imaged using photon-counting scintillation imaging for 12 hours. (C) Merged overlay of panels (A) and (B) to highlight the path that is followed by the radiolabel. (D) We colour the edges of the manually-digitised network according to the logarithm of the conductance values. Edge thickness represents cord thickness. (E) We colour the edges according to the path score (PS) values of the fungal network. (F) MRF curves for conductance-based and PS-based weights. We show MRF curves for effective energy ( $H_{\text{eff}}$ ), effective entropy ( $S_{\text{eff}}$ ), and effective number of communities ( $\eta_{\text{eff}}$ ). See [15] for details, and note that the energy is proportional to the negative of optimised modularity. (In panels (D) and (E), the edges include nodes with degree 2 (as they are needed to trace the curvature of the cords). In the MRF analysis, we remove the nodes with degree  $k = 2$ , and we adjust the weight of the edge that connects the remaining nodes to include the values of the intermediate links for each  $k = 2$  segment.

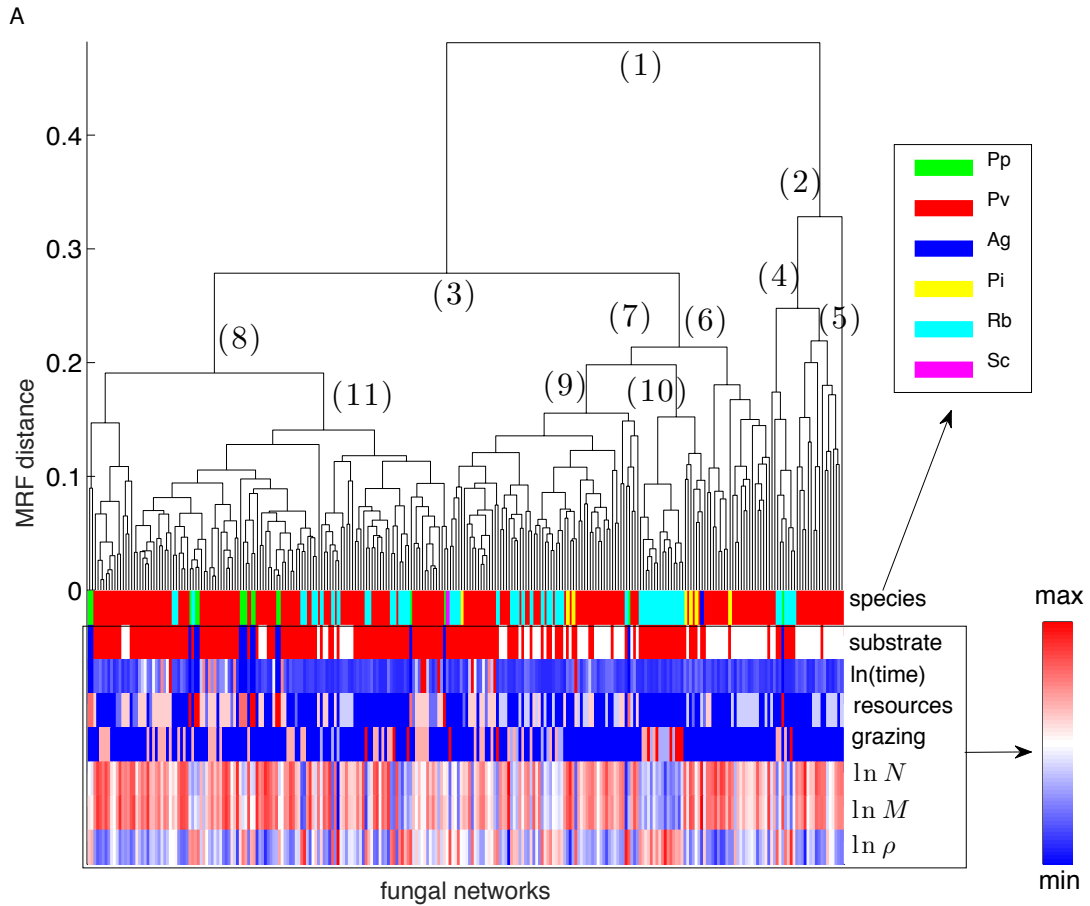

FIG. 2: Taxonomies of 270 fungal (and slime-mould) networks determined using (A) conductance  $G$  and (B) (next page) PS values [13] as the edge weights. We produced this taxonomy using an MRF analysis [15], where we applied average linkage clustering [14] to the MRF-distance from the principal component analysis from the three different mesoscopic response functions (effective energy, effective energy, and effective number of communities) [15]. We used the same methodology (including the determination of community structure using modularity optimisation with a resolution parameter) as in Ref. [15]. See Table I for the species abbreviations, and the levels of substrate, resources, and grazing. At the bottom of the taxonomies, we also show the logarithms of number of nodes  $N$  and edges  $M$ , and the edge density  $\rho = 2M/[N(N - 1)]$ . We label the main branch points in each dendrogram in parentheses. (Note that “branches” in a fungal network are different from “branches” in a taxonomy. It is standard to use such terminology in both contexts.)

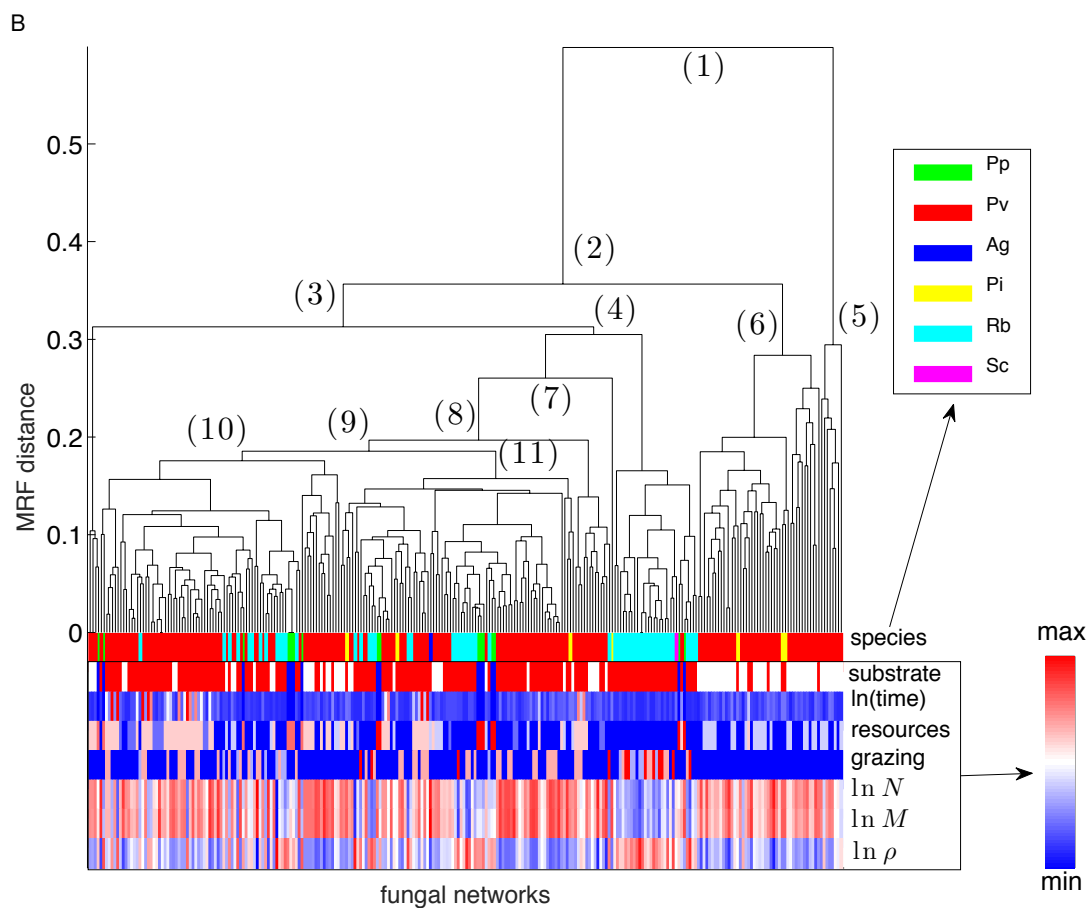

Source: http://biorxiv.org/content/10.1101/006544v1.full.pdf
